# Supplementary material for: Effect of Multiple Rounds of Enrichment on Metabolite Accumulation and Microbiota Composition of Pit Mud for Baijiu Fermentation
Source: MDPI journal article supplement (doi:10.3390/foods12081594), 2023-04-09
Supplement: s1 [file s1]

**Table S1** Statistical analysis of sequencing data of amplicon library of EFB bacteria 16S rDNA

| Sample | SequencesNumber | Asvs | Chao1  | Shannon | Coverage |
|--------|-----------------|------|--------|---------|----------|
| P13_1  | 55861           | 322  | 320.67 | 3.37    | 0.9997   |
| P13_2  | 58762           | 62   | 62.00  | 2.38    | 1.0000   |
| P13_3  | 68658           | 73   | 72.00  | 2.87    | 1.0000   |
| P13_4  | 61615           | 52   | 52.20  | 2.04    | 0.9999   |
| P13_5  | 54423           | 54   | 54.00  | 1.38    | 1.0000   |
| P13_6  | 56794           | 56   | 56.00  | 2.49    | 1.0000   |
| P14_1  | 56999           | 39   | 39.00  | 1.48    | 1.0000   |
| P14_2  | 60307           | 57   | 57.00  | 2.40    | 1.0000   |
| P14_3  | 67120           | 52   | 52.00  | 2.84    | 1.0000   |
| P14_4  | 55696           | 45   | 45.00  | 2.36    | 1.0000   |
| P14_5  | 48510           | 36   | 36.00  | 1.16    | 1.0000   |
| P14_6  | 64485           | 35   | 35.00  | 1.07    | 1.0000   |
