# Supplementary material for: Effect of Multiple Rounds of Enrichment on Metabolite Accumulation and Microbiota Composition of Pit Mud for Baijiu Fermentation
Source: Foods. 2023 Apr 9;12(8):1594. doi: 10.3390/foods12081594 (PMC10137600; doi:10.3390/foods12081594)
Supplement: Supplementary file 1 [file foods-12-01594-s001.zip › Table S2.xlsx]

## Sheet: Sheet1
		P13_1	P14_1	P13_2	P14_2	p13_3	P14_3	P13_4	P14_4	P13_5	P14_5	P13_6	P14_6
	Clostridium guangxiense strain ZGM211	3174	17840	1002	2128	3902	5259	12790	13686	6178	596	1613	1410
	Clostridium kogasense strain YHK0403	1004	333	17914	17506	1622	3737	1230	1828	9	1141	0	49
	Clostridium fermenticellae strain JN500901	1024	952	5001	2743	775	6178	240	1058	393	1390	1436	109
	Clostridium algifaecis strain MB9-7	1197	65	122	1333	6852	1834	311	2630	0	412	0	1233
	Clostridium neuense strain G1	13983	0	85	0	0	0	17	0	0	0	0	0
	Clostridium pabulibutyricum strain MJC39	130	0	173	41	60	704	7913	951	650	296	450	22
	Clostridium liquoris strain BEY10	1389	47	1327	528	94	69	0	5	0	0	0	0
	Clostridium luticellarii strain FW431	689	507	42	129	213	80	193	364	67	465	601
	Clostridium diolis strain SH1	1942	0	0	0	0	0	0	0	0	0	0	0
	Clostridium chromiireducens strain GCAF-1	0	0	0	0	340	0	197	492	6	0	446	0
	Clostridium autoethanogenum DSM 10061	67	0	0	119	0	274	0	407	0	161	0	83
	Clostridium butyricum strain VPI3266	0	0	0	0	252	0	113	172	6	0	281	0
	Clostridium tepidum strain IEH 97212	332	0	136	135	35	36	0	0	0	0	0	0
	Caproicibacterium amylolyticum strain LBM18003	79	12	772	1406	4912	2533	1451	316	135	179	1665	651
	Caproicibacter fermentans strain EA1	0	0	12	11	322	66	352	129	229	133	662	232
	Pediococcus acidilactici DSM 20284	0	0	0	0	0	0	0	226	20226	23786	14136	24064
	Lacticaseibacillus casei DSM 20011 = JCM 1134 = ATCC 393	0	0	0	978	471	4835	1039	1335	664	120	526	308
	Secundilactobacillus mixtipabuli strain IWT30	0	0	0	0	1830	0	496	0	101	0	3	73
	Lactobacillus acetotolerans DSM 20749 = JCM 3825	1675	0	19	0	1	0	0	0	0	0	0	0
	Levilactobacillus brevis ATCC 14869 = DSM 20054	0	0	220	267	112	373	27	472	0	0	0	27
	Weizmannia coagulans DSM 1 = ATCC 7050	32	10647	16	140	14	4	2	9	0	5	0	0
ASV142、103	New3	391	297	2684	2622	4981	3192	1597	2545	474	660	1222	358
ASV135、190	New6	37	0	702	0	2858	1253	2571	3933	1366	1214	5188	1515
ASV116、119	New4	133	56	328	427	490	62	7	0	57	0	3	0
ASV1116	New2	1164	0	0	0	0	0	0	0	0	0	0	0
ASV1117	New7	737	0	0	0	0	0	0	0	0	0	0	0
ASV1118	New9	580	0	0	0	0	0	0	0	0	0	0	0
ASV1119	New1	472	0	0	0	0	0	0	0	0	0	0	0
ASV1120	New8	410	0	0	0	0	0	0	0	0	0	0	0
ASV153、145、148	New5	115	0	201	243	620	267	210	198	195	198	2524	158

## Sheet: Sheet2
		P13_1	P14_1	P13_2	P14_2	p13_3	P14_3	P13_4	P14_4	P13_5	P14_5	P13_6	P14_6
	Clostridium guangxiense strain ZGM211	0.103587	0.580049	0.0327933	0.0697408	0.12948	0.172488	0.418713	0.44787	0.202153	0.0195039	0.0571337	0.046791
	Clostridium kogasense strain YHK0403	0.0327666	0.0108272	0.586287	0.573723	0.0538227	0.122569	0.0402671	0.0598207	0.000294493	0.0373388	0	0.00162607
	Clostridium fermenticellae strain JN500901	0.0334193	0.0309533	0.163672	0.0898961	0.0257168	0.20263	0.007857	0.0346227	0.0128595	0.0454873	0.0508643	0.00361718
	Clostridium algifaecis strain MB9-7	0.0390653	0.00211341	0.0039928	0.0436863	0.227369	0.0601528	0.0101814	0.0860658	0	0.0134826	0	0.0409172
	Clostridium neuense strain G1	0.456349	0	0.00278187	0	0	0	0.000556538	0	0	0	0	0
	Clostridium pabulibutyricum strain MJC39	0.00424268	0	0.00566192	0.00134369	0.00199097	0.0230903	0.259052	0.0311211	0.0212689	0.0096865	0.0159394	0.000730072
	Clostridium liquoris strain BEY10	0.0453314	0.00152816	0.0434299	0.0173041	0.00311919	0.00226311	0	0.000163623	0	0	0	0
	Clostridium luticellarii strain FW431	0.0224862	0.0164846	0.00137457	0.00422771	0.00706796	0.0026239	0.00631834	0.0119118	0.00219234	0.015217	0.0212879	0
	Clostridium diolis strain SH1	0.0633791	0	0	0	0	0	0	0	0	0	0	0
	Clostridium chromiireducens strain GCAF-1	0	0	0	0	0.0112822	0	0.00644929	0.0161005	0.000196329	0	0.0157977	0
	Clostridium autoethanogenum DSM 10061	0.00218661	0	0	0.00389998	0	0.00898685	0	0.0133189	0	0.00526867	0	0.00275436
	Clostridium butyricum strain VPI3266	0	0	0	0	0.00836209	0	0.00369934	0.00562864	0.000196329	0	0.00995324	0
	Clostridium tepidum strain IEH 97212	0.0108352	0	0.00445099	0.00442434	0.0011614	0.00118075	0	0	0	0	0	0
	Caproicibacterium amylolyticum strain LBM18003	0.00257824	0.000390168	0.0252659	0.0460787	0.162994	0.0830791	0.0475021	0.010341	0.00441739	0.00585771	0.0589756	0.0216035
	Caproicibacter fermentans strain EA1	0	0	0.000392734	0.000360502	0.0106849	0.00216472	0.0115236	0.00422148	0.00749321	0.00435238	0.0234486	0.00769894
	Pediococcus acidilactici DSM 20284	0	0	0	0	0	0	0	0.00739577	0.661824	0.778389	0.500708	0.798566
	Lacticaseibacillus casei DSM 20011 = JCM 1134 = ATCC 393	0	0	0	0.0320519	0.0156291	0.158582	0.0340143	0.0436874	0.021727	0.00392696	0.0186313	0.010221
	Secundilactobacillus mixtipabuli strain IWT30	0	0	0	0	0.0607247	0	0.0162378	0	0.00330487	0	0.000106262	0.00242251
	Lactobacillus acetotolerans DSM 20749 = JCM 3825	0.0546653	0	0.000621829	0	3.31829e-05	0	0	0	0	0	0	0
	Levilactobacillus brevis ATCC 14869 = DSM 20054	0	0	0.00720013	0.00875037	0.00371649	0.0122339	0.000883913	0.015446	0	0	0	0.000895998
	Weizmannia coagulans DSM 1 = ATCC 7050	0.00104435	0.346176	0.000523646	0.00458821	0.000464561	0.000131195	6.5475e-05	0.000294522	0	0.000163623	0	0
ASV142、103	New3	0.0127607	0.00965665	0.0878416	0.0859306	0.165284	0.104693	0.0522818	0.0832842	0.01551	0.0215983	0.0432842	0.0118803
ASV135、190	New6	0.00120753	0	0.022975	0	0.0948367	0.0410968	0.0841681	0.128706	0.0446975	0.0397277	0.183763	0.0502754
ASV116、119	New4	0.00434059	0.00182078	0.0107347	0.013994	0.0162596	0.00203352	0.000229163	0	0.00186512	0	0.000106262	0
ASV1116	New2	0.0379883	0	0	0	0	0	0	0	0	0	0	0
ASV1117	New7	0.0240527	0	0	0	0	0	0	0	0	0	0	0
ASV1118	New9	0.0189289	0	0	0	0	0	0	0	0	0	0	0
ASV1119	New1	0.0154042	0	0	0	0	0	0	0	0	0	0	0
ASV1120	New8	0.0133808	0	0	0	0	0	0	0	0	0	0	0
